# Supplementary material for: Fe@g-C3N4: an effective photocatalyst for Baeyer–Villiger oxidation under visible light condition
Source: Royal Society of Chemistry journal article supplement (doi:10.1039/d3nj01292a), 2023-01-01
Supplement: d3nj01292a1.pdf [file d3nj01292a1.pdf]

## **Fe@g-C<sub>3</sub>N<sub>4</sub>: An effective photocatalyst for Baeyer-Villiger oxidation under visible light condition**

**Bharat A. Maru<sup>a</sup>, Gaurang J. Bhatt<sup>a</sup>, Urvi Lad<sup>a</sup>, Pradeep T. Deota<sup>a</sup>, Sanjeev Kane<sup>b</sup>, U. K. Goutam<sup>c</sup>, Chetan K. Modi<sup>\*,a</sup>**

<sup>a</sup>*Applied Chemistry Department, Faculty of Technology and Engineering, The Maharaja Sayajirao University of Baroda, Vadodara-390001*

<sup>b</sup>*Synchrotrons Utilisation Section, Raja Ramanna Centre for Advanced Technology, Indore 452013, India*

<sup>c</sup>*Technical Physics Division, Bhabha Atomic Research Centre, Mumbai-400085, India*

*E-mail: [chetanmodi-appchem@msubaroda.ac.in](mailto:chetanmodi-appchem@msubaroda.ac.in)*

---

### **Supporting Information**

#### **Materials**

Urea (>99% pure) and anhydrous FeCl<sub>3</sub> were purchased from SD Fine-Chem Ltd., India. Barbituric acid was purchased from Chemdyes Corporation, India. Hydrogen peroxide (30%) AR was purchased from Loba Chemie Pvt. Ltd., India. Cyclohexanone (purity >99%) was purchased from Merck Ltd., India. A white LED light (12W) was purchased from a local electronic shop, Legrand, Vadodara, India.

#### **Characterization techniques**

For the characterization of the as-synthesized materials such as neat g-C<sub>3</sub>N<sub>4</sub> and Fe@gC<sub>3</sub>N<sub>4</sub> nanocatalysts with varying ratios viz., 1:1, 1:3, and 1:5, different physiochemical techniques were employed. The quantitative analysis of Fe metal ion in Fe@gC<sub>3</sub>N<sub>4</sub> nanocatalysts was carried out by ICP-OES analysis (Make: Agilent Model: 5800 VDV) at the Central Salt and Marine Chemicals Research Institute (CSMCRI), Bhavnagar, India. FTIR spectra of as-prepared materials were performed in the range of 4000-500 cm<sup>-1</sup> on a model: Spectrum Two Perkin Elmer using KBr pellets. The structure determinations of as-synthesized materials were performed on Rigaku Smart Lab SE X-ray powder diffractometer with a CuKα (λ=1.54058) target and movable detector from the Applied Physics Department, The Maharaja Sayajirao University of Baroda, Vadodara, India. The XPS spectra were performed on a Specs Phoibios 225 spectrometer with Al Kα radiation (1486.6 eV) at the

Synchrotrons Utilisation Section, Raja Ramanna Centre for Advanced Technology, Indore, India. Transmission electron microscopy (TEM) of the as-synthesized materials was performed on Model: JEOL, JEM 2100 from the Centre Salt and Marine Chemicals Research Institute (CSMCRI), Bhavnagar, India. GC of obtained products were performed on model: Thermo, Trace-GC Ultra using DB-5 capillary column (30 m, 0.32 mm id, 0.25  $\mu\text{m}$  film thickness. GC-MS of obtained products was performed on GCMSTQ8040, Shimadzu, QP-2010, from the Centre Salt and Marine Chemicals Research Institute (CSMCRI), Bhavnagar, India.

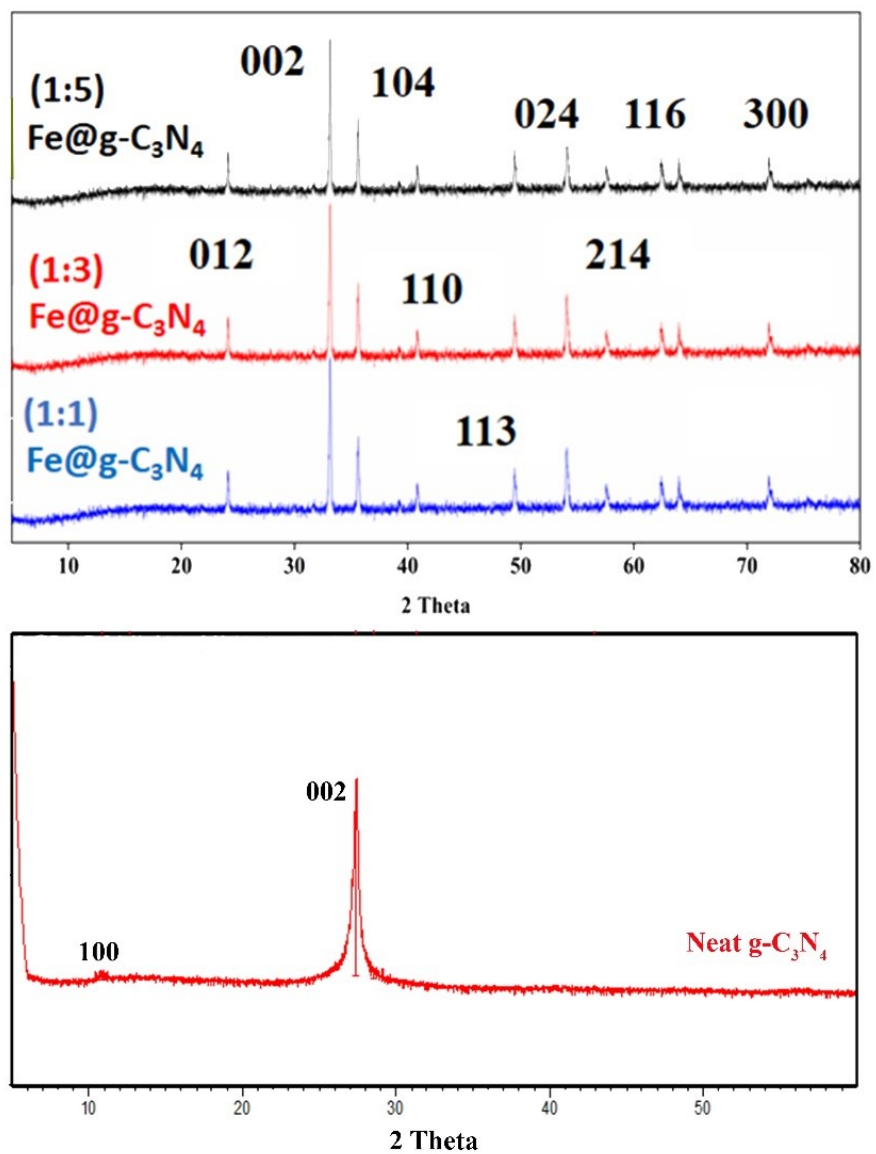

**Fig. S1** XRD patterns of neat g-C<sub>3</sub>N<sub>4</sub>, Fe@g-C<sub>3</sub>N<sub>4</sub> (1:1), Fe@g-C<sub>3</sub>N<sub>4</sub> (1:3), Fe@g-C<sub>3</sub>N<sub>4</sub> (1:5) catalysts

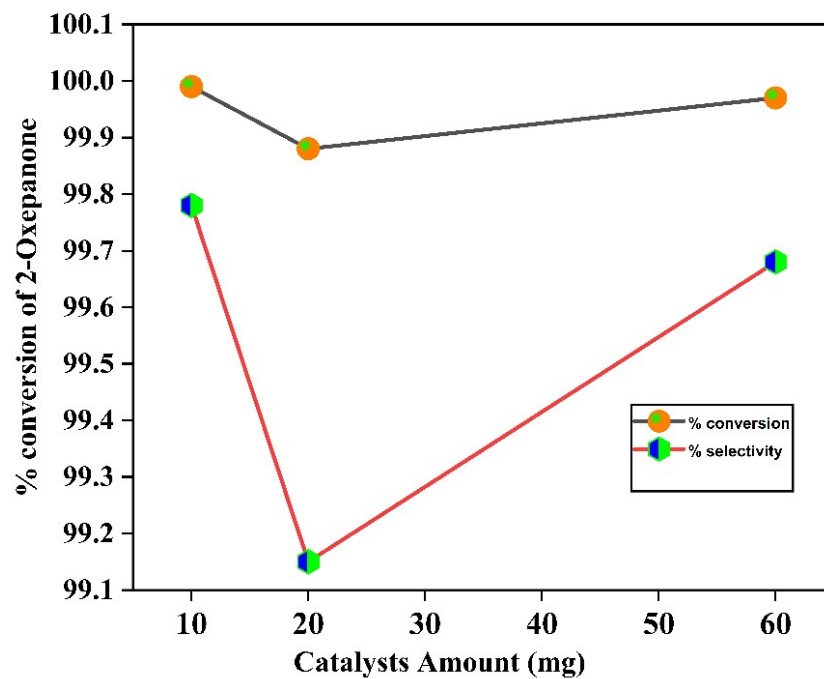

**Fig. S2** The effect of catalyst dosage in the Baeyer-Villiger oxidation reaction

Reaction condition: cyclohexanone (8.29 mL, 0.08 mol), 30% H<sub>2</sub>O<sub>2</sub> (1.88 mL, 0.08 mol), Fe@gC<sub>3</sub>N<sub>4</sub> (1:1) X mg, Without solvent, temp. (Room temperature), time (1 h), under 12 W white LED

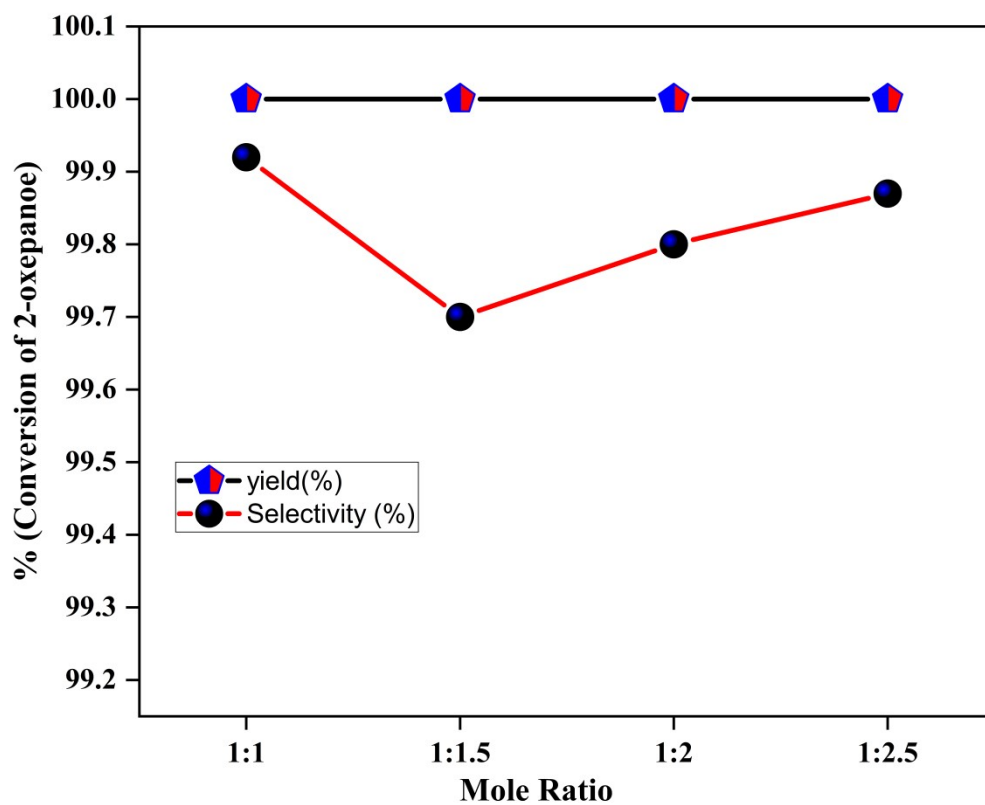

**Fig. S3** The effect of mole ratio (cyclohexanone: H<sub>2</sub>O<sub>2</sub>) in the Baeyer-Villiger oxidation reaction

Reaction condition: cyclohexanone (8.29 mL, 0.08 mol), 30% H<sub>2</sub>O<sub>2</sub> (X mol), Fe@gC<sub>3</sub>N<sub>4</sub> (1:1) (10 mg, 0.05 mol% of Fe), without solvent, temp. (Room temperature), time (1 h), under 12 W white LED

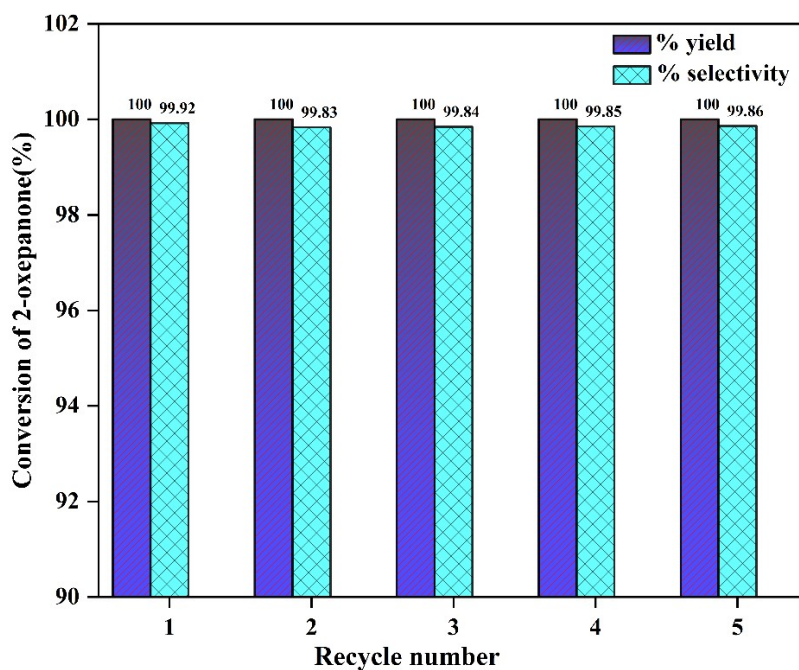

**Fig. S4** Recyclability of Fe@gC<sub>3</sub>N<sub>4</sub> (1:1) in the Baeyer-Villiger oxidation reaction

Reaction condition: cyclohexanone (8.29 mL, 0.08 mol), 30% H<sub>2</sub>O<sub>2</sub> (1.88 mL, 0.08 mol), Fe@gC<sub>3</sub>N<sub>4</sub> (1:1) (10 mg, 0.05 mol% of Fe), without solvent, temp. (Room temperature), time (1 h), under 12 W white LED

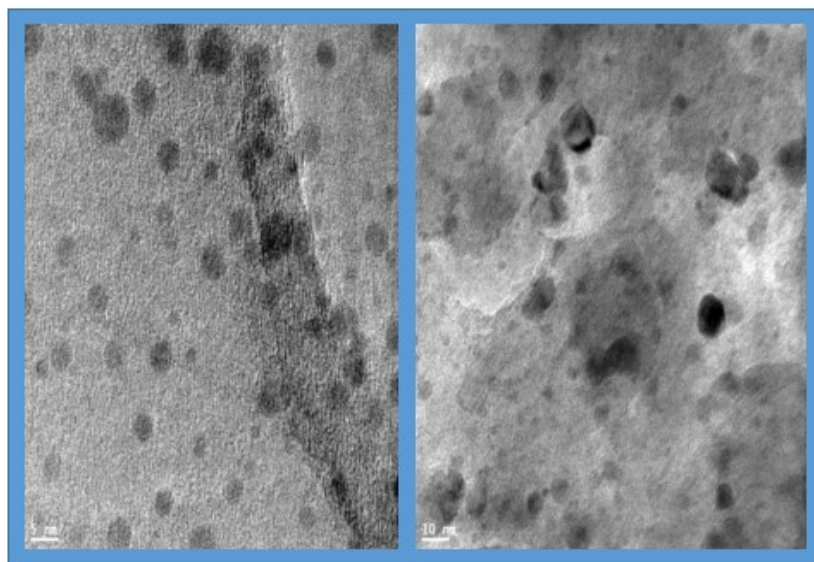

**Fig. S5** TEM images of Fe@gC<sub>3</sub>N<sub>4</sub> (1:1) catalyst (after 5<sup>th</sup> cycle)
